# Supplementary material for: Development of a Novel Electrochemiluminescence ELISA for Quantification of α-Synuclein Phosphorylated at Ser129 in Biological Samples
Source: PubMed Central journal article supplement (PMC10080651; doi:10.1021/acschemneuro.2c00676), 2023-03-15
Supplement: cn2c00676_si_001.pdf [file cn2c00676_si_001.pdf]

## Supplementary information

# Development of a novel electrochemiluminescence ELISA for quantification of $\alpha$ -synuclein phosphorylated at Ser<sup>129</sup> in biological samples

Suman Dutta, PhD<sup>1†</sup>, Simon Hornung<sup>1††</sup>, Hash Brown Taha<sup>1,2†</sup>, Karl Biggs<sup>1</sup> Ibrar Siddique<sup>1</sup>, Lea M. Chamoun<sup>1</sup>, Hedieh Shahpasand-Kroner<sup>1</sup>, Carter Lantz<sup>3</sup>, Marcos Herrera-Vaquero<sup>4</sup>, Nadia Stefanova<sup>4</sup>, Joseph A. Loo<sup>3,5</sup>, and Gal Bitan, PhD<sup>1,5,6\*</sup>

<sup>1</sup>Department of Neurology, David Geffen School of Medicine, <sup>2</sup>Department of Integrative Biology & Physiology, <sup>3</sup>Department of Chemistry and Biochemistry, University of California Los Angeles, CA 90095, USA, <sup>4</sup>Division of Neurobiology, Department of Neurology, Medical University of Innsbruck, Austria, <sup>5</sup>Brain Research Institute and <sup>6</sup>Molecular Biology Institute, University of California, Los Angeles, CA 90095, USA

**\*To whom correspondence should be addressed:**

### **Gal Bitan**

Department of Neurology,  
David Geffen School of Medicine at UCLA,  
635 Charles E. Young Drive South/Gordon 451  
Los Angeles, CA 90095  
E-mail: gbitan@mednet.ucla.edu  
Phone: 310-206-2082

**‡ These authors contributed equally**

**† Current address: Division of Peptide biochemistry, TUM School of Life Sciences, Technical University of Munich, 85354 Freising, Germany**

Key words: Electrochemiluminescence ELISA,  $\alpha$ -synuclein, phosphorylation, pS129, biomarker

**Table S1: Signal/background (S/B) and signal/noise (S/N) ratios for pS<sup>129</sup> α-syn and α-syn of the evaluated antibody pairs.<sup>1</sup>**

| Capture antibody                               | Detection antibody               | S/B (pS <sup>129</sup> α-syn) | S/N (pS <sup>129</sup> α-syn) | S/B (α-syn) | S/N (α-syn) |
|------------------------------------------------|----------------------------------|-------------------------------|-------------------------------|-------------|-------------|
| Biotin-EP1536Y (anti-pS <sup>129</sup> -α-syn) | Anti-human α-syn-Sulfo tag (MSD) | 426                           | 43674                         | 1           | 86          |
| Biotin-anti-human α-syn (MSD)                  | EP1536Y-Sulfo tag                | 651                           | 49217                         | 1           | 65          |
| Biotin-MJFR1 (anti-human α-syn)                | EP1536Y-Sulfo tag                | 37                            | 2791                          | 1           | 43          |

The S/B and S/N ratios are averages of three standard concentration points within the linear range of the assay using each antibody pair.

**Table S2: Calculated concentrations, total error (TE)<sup>2</sup> and relative error (RE)<sup>3</sup> of pS<sup>129</sup>-α-syn ECLIA using EP1536Y for capture and anti-human α-syn antibody (MSD) for detection.**

| pS <sup>129</sup> -α-syn (pg/mL) | Assay 1 |       | Assay 2 |       | Assay 3 | TE (%) | RE (%) |
|----------------------------------|---------|-------|---------|-------|---------|--------|--------|
|                                  | 1       | 2     | 1       | 2     | 1       |        |        |
| 66176                            | 77102   | 65766 | 68279   | 71620 | 66202   | 18.4   | 5.7    |
| 33088                            | 33119   | 31361 | 32100   | 33769 | 34979   | 10.9   | 3.2    |
| 16544                            | 14916   | 15799 | 14657   | 16233 | 15718   | 13.6   | 6.5    |
| 8272                             | 7836    | 8250  | 7690    | 7918  | 8151    | 8.6    | 3.7    |
| 2068                             | 2269    | 2148  | 2266    | 2244  | 2004    | 16.7   | 7.0    |
| 517                              | 613     | 571   | 604     | 605   | 550     | 23.2   | 13.8   |
| 129                              | 126     | 124   | 122     | 122   | 141     | 16.4   | 5.3    |
| 32                               | 18      | 23    | 26      | 21    | 32      | 54.8   | 25.0   |
| 8                                | 5.7     | 4.4   | 3.8     | 4.7   | 5.9     | 58.6   | 38.8   |
| 2                                | 1.7     | 4.0   | 2.1     | 2.5   | 0.8     | 146.3  | 41.0   |
| 0.5                              | 1.5     | 2.2   | 2.1     | 1.8   | 1.7     | 375.1  | 272.0  |

TE (%) = ((calculated concentration – actual concentration) + 2 SD)/actual concentration) × 100; RE (%) = ((calculated concentration – actual concentration)/actual concentration) × 100.

**Table S3: Calculated concentrations, total error (TE)<sup>2</sup> and relative error (RE)<sup>3</sup> of pS<sup>129</sup> ECLIA using the Biotin-anti-human α-syn (MSD) - EP1536Y-Sulfo tag antibody pair.**

| pS <sup>129</sup> α-syn (pg/mL) | Assay 1 |       | Assay 2 |       | TE (%) | RE (%) |
|---------------------------------|---------|-------|---------|-------|--------|--------|
|                                 | 1       | 2     | 1       | 2     |        |        |
| 66176                           | 71338   | 65440 | 64368   | 69755 | 13.0   | 4.3    |
| 33088                           | 32655   | 33723 | 34581   | 32114 | 8.4    | 2.7    |
| 16544                           | 16352   | 16028 | 17348   | 16315 | 8.7    | 2.6    |
| 8272                            | 8161    | 8136  | 7653    | 8174  | 8.2    | 2.9    |
| 2068                            | 2096    | 2112  | 2118    | 2094  | 2.8    | 1.8    |
| 517                             | 527     | 518   | 533     | 506   | 5.8    | 1.8    |
| 129                             | 128     | 137   | 139     | 132   | 11.1   | 4.2    |
| 32                              | 19      | 28    | 32      | 26    | 49.1   | 18.8   |
| 8                               | 14      | 8.1   | 6.4     | 3.5   | 137.8  | 38.9   |
| 2                               | n.d.    | 2.9   | 0.8     | 3.2   | 174.2  | 66.4   |
| 0.5                             | 3.9     | 0.5   | 2.1     | 2.5   | 836.1  | 352.9  |

n.d. – not determined

**Table S4: Calculated concentrations, total error (TE)<sup>2</sup> and relative error (RE)<sup>3</sup> of pS<sup>129</sup> ECLIA using the Biotin-MJFR1 - EP1536Y-Sulfo tag antibody pair.**

| pS <sup>129</sup> α-syn (pg/mL) | Assay 1 |       | Assay 2 |       | TE (%) | RE (%) |
|---------------------------------|---------|-------|---------|-------|--------|--------|
|                                 | 1       | 2     | 1       | 2     |        |        |
| 66176                           | 60951   | 65118 | 64829   | 69720 | 13.6   | 4.2    |
| 33088                           | 33826   | 34340 | 32593   | 34348 | 7.2    | 2.8    |
| 16544                           | 16393   | 18542 | 15645   | 17102 | 18.4   | 5.4    |
| 8272                            | 9349    | 7820  | 7639    | 8187  | 22.9   | 6.8    |
| 2068                            | 1631    | 1791  | 2338    | 2130  | 39.5   | 12.6   |
| 517                             | 397     | 298   | 470     | 585   | 62.6   | 22.0   |
| 129                             | 468     | 751   | 108     | 97    | 618.6  | 196.4  |
| 32                              | 7.0     | n.d.  | 15      | 10    | 86.8   | 66.7   |
| 8                               | 2.0     | n.d.  | 8.2     | 28    | 384.4  | 108.5  |
| 2                               | 39      | 10    | n.d.    | 17    | 2198.9 | 999.1  |
| 0.5                             | 0.6     | n.d.  | 2.9     | 2.9   | 752.1  | 317.5  |

n.d. – not determined

**Table S5: ECL signal of pS<sup>129</sup> α-syn standards using 2 or 5 µg/mL Biotin-EP1536Y capture antibody and MSD Sulfo-tag antibody for detection.**

| pS <sup>129</sup> α-syn (pg/mL) | 2 µg/mL capture antibody | 5 µg/mL capture antibody |
|---------------------------------|--------------------------|--------------------------|
| 10000                           | 107291                   | 103256                   |
| 2500                            | 17083                    | 16278                    |
| 625                             | 3529                     | 3507                     |
| 156                             | 957                      | 902                      |
| 39                              | 332                      | 317                      |
| 9.8                             | 152                      | 135                      |
| 2.4                             | 116                      | 95                       |
| 0                               | 96                       | 91                       |

Financial Disclosure/Conflict of interests: GB, SD, and KB are co-authors and co-inventors of Patent Application No. 63/482,173 entitled “An electrochemiluminescence ELISA for pS129-α-synuclein.”

## References

1. Zhang, J. H.; Chung, T. D.; Oldenburg, K. R., A Simple Statistical Parameter for Use in Evaluation and Validation of High Throughput Screening Assays. *J. Biomol. Screen.* **1999**, *4* (2), 67-73.
2. Westgard, J. O.; Carey, R. N.; Wold, S., Criteria for judging precision and accuracy in method development and evaluation. *Clin. Chem.* **1974**, *20* (7), 825-33.
3. Kat, C.-J.; Els, P. S., Validation metric based on relative error. *Math. Comput. Model. Dyn. Syst.* **2012**, *18* (5), 487-520.
